# Supplementary material for: Intercomparison of online and offline XRF spectrometers for determining the PM 10 elemental composition of ambient aerosol
Source: Copernicus journal article supplement (doi:10.5194/egusphere-2025-110), 2025-03-11
Supplement: Supplementary file [file Figure 4.pdf › Figure 4.pdf]

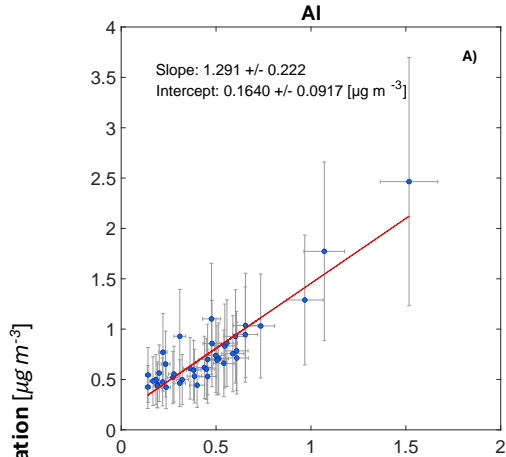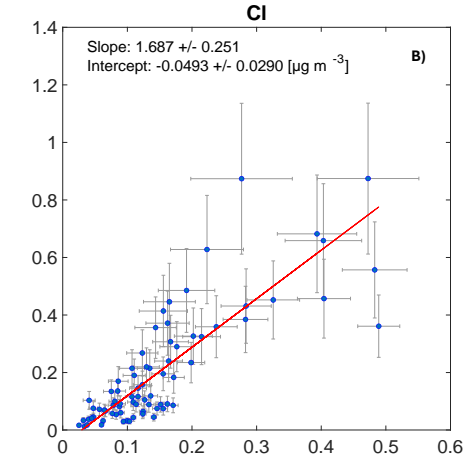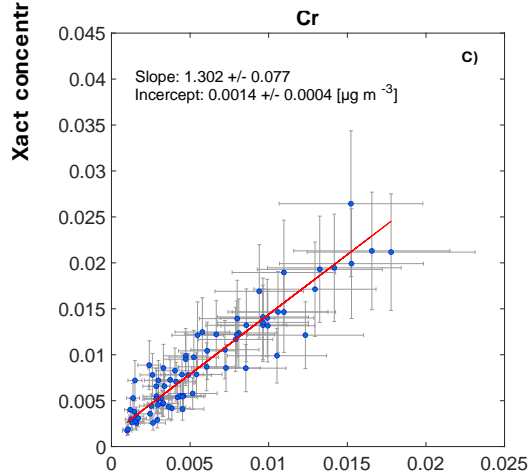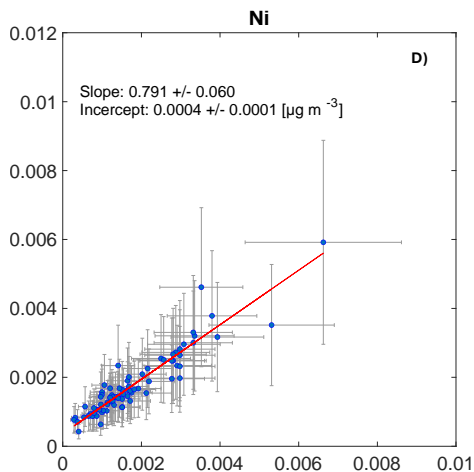

Offline XRF concentration  $[\mu\text{g m}^{-3}]$
